# Supplementary material
Source: PubMed Central journal article supplement (PMC4056820)
Supplement: ml2001246_si_001.pdf [file ml2001246_si_001.pdf]

## Supporting Information

### **Discovery of a Potent HIV Integrase Inhibitor that Leads to a Prodrug with Significant anti-HIV Activity**

Byung I. Seo, Vinod R. Uchil, Maurice Okello, Sanjay Mishra, Xiao-Hui Ma, Malik Nishonov,  
Qingning Shu, Guochen Chi and Vasu Nair\*

*Department of Pharmaceutical and Biomedical Sciences and the Center for Drug Discovery,*

*University of Georgia, Athens, GA 30602, USA.*

#### **Contents**

|                                                    |     |
|----------------------------------------------------|-----|
| Synthesis of Integrase Inhibitor and its Prodrug   | S2  |
| HPLC Purity of Integrase Inhibitor and its Prodrug | S8  |
| Antiviral Assays                                   | S9  |
| Cytochrome P450 Isozyme Assays                     | S9  |
| Stability Assays in Pooled Human Liver Microsomes  | S11 |
| UDP-Glucuronosyltransferase Assays                 | S11 |

## Synthesis of integrase inhibitor 2

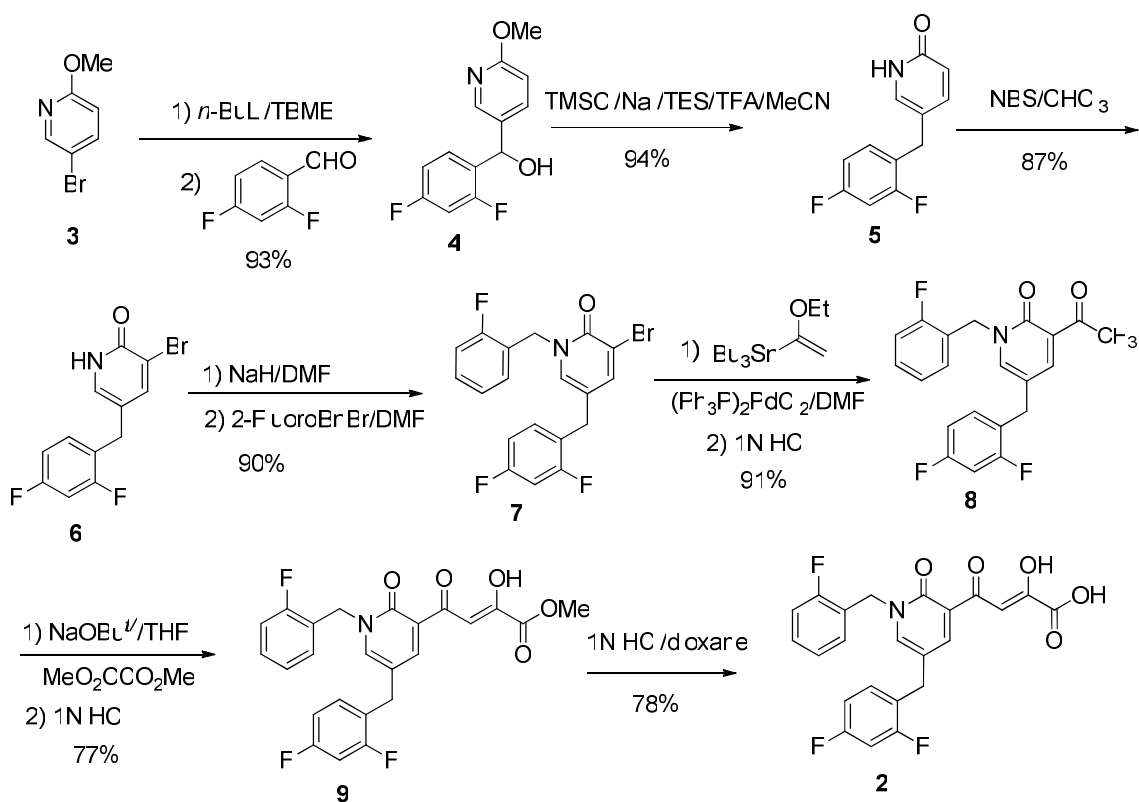

### (2,4-Difluorophenyl)(6-methoxypyridin-3-yl)methanol (4).

To a mixture of 5-bromo-2-methoxypyridine, **3** (2.10 g, 10.6 mmol) in anhydrous *tert*-butyl methyl ether (20 mL) at  $-32^\circ\text{C}$  and under an argon atmosphere, was added dropwise over 15 min, *n*-BuLi (5.8 mL of a 2 M solution in cyclohexane, 11.7 mmol). After stirring for 1h, 2,4-difluorobenzaldehyde (1.54 g, 10.6 mmol) was added dropwise over 15 min and the reaction mixture was stirred for 1h and then allowed to warm up to  $0^\circ\text{C}$  and quenched with saturated  $\text{NH}_4\text{Cl}$  (20 mL). The phases were separated and the aqueous layer was extracted twice with *tert*-butyl methyl ether (20 mL and 10 mL). The combined organic phase was washed with water (50 mL) and dried over anhydrous  $\text{Na}_2\text{SO}_4$ . The solvent was evaporated *in vacuo* and the residue

was purified by flash column chromatography on silica gel (hexanes: ethyl acetate, 85:15). Yield 2.60 g (93%).  $^1\text{H}$  NMR ( $\text{CDCl}_3$ , 500 MHz): 8.16 (s, 1H), 7.57-7.52 (m, 2H), 6.93-6.76 (m, 2H), 6.72 (d, 1H,  $J = 9.0$  Hz), 6.07 (d, 1H,  $J = 3.5$  Hz), 3.92 (s, 3H).  $^{13}\text{C}$  NMR ( $\text{CDCl}_3$ , 125 MHz): 163.9, 162.4, 159.6, 145.0, 137.2, 131.0, 128.2, 126.5, 111.5, 110.9, 103.9, 67.3, 53.6. HRMS: calcd for  $\text{C}_{13}\text{H}_{12}\text{F}_2\text{NO}_2$  252.0836  $[\text{M}+\text{H}]^+$  found 252.0837.

#### **5-(2,4-Difluorobenzyl)pyridin-2(1H)-one (5).**

A mixture of (2,4-difluorophenyl)-(6-methoxypyridin-3-yl)methanol, **4** (2.28 g, 9.1 mmol), NaI (5.45 g, 36.4 mmol), triethylsilane (2.2 mL, 13.6 mmol) in anhydrous  $\text{CH}_3\text{CN}$  (21 mL) was stirred at room temperature. TFA (1.1 mL, 14.3 mmol) was added at a rate that maintained the temperature below  $30^\circ\text{C}$ , and then followed with the addition of TMSCl (5.8 mL, 45.5 mmol). The reaction mixture was heated at  $70^\circ\text{C}$  for 3h. Upon cooling to  $55^\circ\text{C}$ ,  $\text{Na}_2\text{SO}_3$  (0.8 M, 11.4 mL) was added, and the reaction mixture was concentrated in *vacuo* to 20 mL. A solution of  $\text{Na}_2\text{SO}_3$  (0.15 M, 11.4 mL) was added and the mixture was stirred at room temperature overnight and then treated with  $\text{K}_2\text{CO}_3$  (1.4 M, 13.6 mL) at  $0^\circ\text{C}$ . The crude product was extracted with ethyl acetate (60 mL) and the extract was washed with  $\text{Na}_2\text{SO}_3$  (0.15 M, 20mL) and water (60 mL) and then dried over anhydrous  $\text{Na}_2\text{SO}_4$ . The solvent was removed and the residue was purified by flash column chromatography on silica gel ( $\text{CHCl}_3$ :  $\text{CH}_3\text{OH}$ , 90:10). Yield 1.89 g (94 %).  $^1\text{H}$  NMR ( $\text{CDCl}_3$ , 500 MHz): 13.35 (s, 1H), 7.36-6.79 (m, 7H), 6.53 (d, 1H,  $J = 9.2$  Hz), 3.71 (s, 2H).  $^{13}\text{C}$  NMR ( $\text{CDCl}_3$ , 125 MHz): 164.7, 162.4, 160.4, 143.2, 132.7, 131.2, 122.3, 120.3, 118.4, 111.4, 104.1, 30.3. HRMS: calcd for  $\text{C}_{12}\text{H}_9\text{F}_2\text{NO}$ , 221.0652  $[\text{M}+\text{H}]^+$  found 221.0648.

**5-(2,4-Difluorobenzyl)-3-bromopyridin-2(1H)-one (6).**

To a solution of 5-(2,4-difluorobenzyl)pyridin-2(1H)-one, **5** (1.89 g, 8.5 mmol) in CHCl<sub>3</sub> (25 mL) was added NBS (1.67 g, 9.4 mmol) and the mixture was heated under reflux for 2h and then cooled to room temperature. Insoluble succinimide by-product was filtered. The filtrate was washed with water, dried over anhydrous Na<sub>2</sub>SO<sub>4</sub> and concentrated. The resulting brown solid was purified by trituration with CH<sub>3</sub>OH. Yield 2.23 g (87 %). <sup>1</sup>H NMR (CDCl<sub>3</sub>, 500 MHz): 13.59 (s, 1H), 7.78 (s, 1H), 7.30- 6.84 (m, 4H), 3.74 (s, 2H). <sup>13</sup>C NMR (CDCl<sub>3</sub>, 125 MHz): 163.2, 163.1, 161.8, 161.2, 161.1, 161.0, 159.9, 159.8, 144.9, 132.4, 131.3, 131.2, 131.2, 121.7, 121.6, 121.6, 119.4, 115.5, 111.7, 111.7, 111.6, 111.5, 104.5, 104.3, 104.1, 30.1. HRMS: calcd for C<sub>12</sub>H<sub>8</sub>BrF<sub>2</sub>NO, 298.9757 [M+H]<sup>+</sup>, found 298.9759.

**3-Bromo-5-(2,4-difluorobenzyl)-1-(2-fluorobenzyl)-pyridin-2(1H)-one (7).**

To a suspension of 3-bromo-5-(2,4-difluorobenzyl)-pyridin-2(1H)-one, **6** (5.58 g, 18.6 mmol) in anhydrous DMF (160 mL) was added NaH (60% suspension in mineral oil, 0.82 g, 20.5 mmol) at room temperature. After stirring for 15 min, *o*-fluorobenzyl bromide (3.86 g, 20.5 mmol) was added and the reaction mixture was stirred for 2h. The solvent was removed and the residue was dissolved in EtOAc (200 mL), washed with water (200 mL), followed by brine (200 mL) and then dried over anhydrous Na<sub>2</sub>SO<sub>4</sub>. The solvent was removed and the residue was purified by flash column chromatography on silica gel (hexanes: EtOAc, 80:20). Yield 6.83 g (90 %). <sup>1</sup>H NMR (CDCl<sub>3</sub>, 500 MHz): 7.59- 6.83 (m, 9H), 5.18 (s, 2H), 3.69 (s, 2H). <sup>13</sup>C NMR (CDCl<sub>3</sub>, 125 MHz): 163.1, 163.0, 162.1, 161.8, 161.7, 161.5, 161.0, 160.1, 159.9, 159.8, 158.3, 142.7, 135.3, 135.3, 132.0, 132.0, 131.2, 131.1, 131.1, 131.1, 130.3, 124.6, 124.6, 122.6, 122.4, 121.9, 121.9,

121.8, 121.8, 117.5, 117.0, 115.5, 115.3, 111.6, 111.6, 111.5, 111.4, 104.3, 104.1, 103.9, 48.0, 30.2. HRMS: calcd for C<sub>19</sub>H<sub>13</sub>BrF<sub>3</sub>NO, 407.0133 [M+H]<sup>+</sup> found 407.0127.

**3-Acetyl-5-(2,4-difluorobenzyl)-1-(2-fluorobenzyl)pyridin-2(1H)-one (8).**

A mixture of 3-bromo-5-(2,4-difluorobenzyl)-1-(2-fluorobenzyl)-pyridin-2(1H)-one, **7** (6.61 g, 16.1 mmol), bis(triphenylphosphine)palladium(II) chloride (1.13 g, 1.61 mmol) and ethoxyvinyl(tributyl)tin (11.69 g, 32.3 mmol) in anhydrous DMF (145 mL) was heated at 70°C under an argon atmosphere for 1h. The solvent was removed and the residue was dissolved in EtOAc (145 mL), filtered through a pad of celite and the filtrate was stirred with dil. HCl (1N, 145 mL) for 15 min. The organic phase was washed with water (2 x 145 mL) followed by brine (145 mL) and then dried over anhydrous Na<sub>2</sub>SO<sub>4</sub>. The solvent was removed and the residue was purified by flash column chromatography on silica gel (hexanes: EtOAc, 80:20). Yield 5.47 g (91%). <sup>1</sup>H NMR (CDCl<sub>3</sub>, 500 MHz): 7.98 (d, 1H, *J* = 2.6 Hz), 7.49-7.44 (m, 2H), 7.35-7.30 (m, 1H), 7.16-7.07 (m, 3H), 6.85-6.78 (m, 2H), 5.17 (s, 2H), 3.71 (s, 2H), 2.67 (s, 3H). <sup>13</sup>C NMR (CDCl<sub>3</sub>, 125 MHz): 197.6, 162.4, 162.1, 160.5, 160.4, 160.2, 144.4, 141.4, 131.4, 131.2, 130.4, 127.7, 124.6, 122.6, 122.1, 116.9, 115.6, 111.5, 104.1, 47.2, 30.9, 30.5. HRMS: calcd for C<sub>21</sub>H<sub>17</sub>F<sub>3</sub>NO<sub>2</sub>, 372.1211 [M+H]<sup>+</sup> found 372.1200.

**Methyl 4-(5-(2,4-difluorobenzyl)-1-(2-fluorobenzyl)-2-oxo-1,2-dihydropyridin-3-yl)-2-hydroxy-4-oxobut-2-enoate (9).**

To a stirred solution of sodium *tert*-butoxide (4.49 g, 45.3 mmol) in anhydrous THF (230 mL) was added a solution of dimethyl oxalate (5.41 g, 45.3 mmol) in anhydrous THF (60 mL) under an argon atmosphere and the reaction mixture was stirred for 30 min at room temperature. A solution of 3-acetyl-5-(2,4-difluorobenzyl)-1-(2-fluorobenzyl)pyridin-2(1H)-one **8** (4.21 g, 11.3

mmol) in THF (60 mL) was added and, after stirring for 3h at room temperature, dil. HCl (1N, 230 mL) was added in one portion at 0-5°C in ice bath. The product was extracted with EtOAc (2 x 230 mL) and the combined organic phase was washed with saturated brine (2 x 230 mL). The solvent was removed affording a brown residue, which was purified by trituration with CH<sub>3</sub>OH. Yield 3.99 g (77 %). <sup>1</sup>H NMR (CDCl<sub>3</sub>, 500 MHz): 8.18 (d, 1H, *J* = 3.1 Hz), 7.89 (s, 1H), 7.53 (s, 1H), 7.49-7.46 (s, 1H), 7.35-7.31 (s, 1H), 7.16-7.07 (m, 3H), 6.87-6.80 (m, 2H), 5.20 (s, 2H), 3.90 (s, 3H), 3.75 (s, 2H). <sup>13</sup>C NMR (CDCl<sub>3</sub>, 125 MHz): 185.0, 171.9, 162.8, 162.6, 162.2, 160.6, 160.2, 159.6, 144.8, 142.0, 131.7, 131.2, 130.6, 124.8, 123.6, 122.4, 121.9, 117.7, 115.7, 111.7, 104.3, 101.8, 53.2, 47.6, 30.6. HRMS: calcd for C<sub>24</sub>H<sub>19</sub>F<sub>3</sub>NO<sub>5</sub>, 458.1215 [M+H]<sup>+</sup> found 458.1225.

**4-(5-(2,4-Difluorobenzyl)-1-(2-fluorobenzyl)-2-oxo-1,2-dihydropyridin-3-yl)-2-hydroxy-4-oxobut-2-enoic acid (2).**

To a stirred solution of methyl 4-(5-(2,4-difluorobenzyl)-1-(2-fluorobenzyl)-2-oxo-1,2-dihydropyridin-3-yl)-2-hydroxy-4-oxobut-2-enoate, **9** (2.59 g, 5.7 mmol) in 1,4-dioxane (125 mL) was added dil. HCl (1N, 63 mL) and the reaction mixture was heated at 95°C with stirring for 2 h. Solvent was removed and the residual solid was purified by trituration with CHCl<sub>3</sub>. Yield 1.95 g (78 %). Yellow solid, mp 187- 189°C, UV (CH<sub>3</sub>OH) 394 nm (ε 14,917), 320 nm (ε 5,671). <sup>1</sup>H NMR (CDCl<sub>3</sub>-MeOH-*d*<sub>4</sub>, 500 MHz): 8.17 (d, 1H, *J*=3.4 Hz), 7.88 (s, 1H), 7.54 (s, 1H), 7.48-7.45 (m, 1H), 7.36-7.30 (m, 1H), 7.17-7.07 (m, 3H), 6.87-6.81 (m, 2H), 5.19 (s, 2H), 3.76 (s, 2H). <sup>13</sup>C NMR (DMSO-*d*<sub>6</sub>, 125 MHz): 184.5, 173.3, 163.2, 161.7, 161.2, 159.8, 158.6, 144.6, 131.9, 130.0, 129.8, 124.5, 123.1, 123.0, 121.5, 116.8, 115.4, 111.6, 103.9, 100.8, 47.3, 29.2. HRMS: calcd C<sub>23</sub>H<sub>17</sub>F<sub>3</sub>NO<sub>5</sub>, 444.1059 [M+H]<sup>+</sup> found 444.1042.

## Synthesis of prodrug **10** from compound **2**

**Isopropyl 4-(5-(2,4-difluorobenzyl)-1-(2-fluorobenzyl)-2-oxo-1,2-dihydropyridin-3-yl)-2-hydroxy-4-oxobut-2-enoate (**10**).**

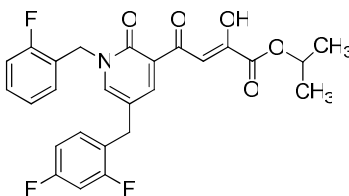

### **10**

To a stirred solution of 4-(5-(2,4-difluorobenzyl)-1-(2-fluorobenzyl)-2-oxo-1,2-dihydro-pyridin-3-yl)-2-hydroxy-4-oxo-but-2-enoic acid **2** (0.21 g, 0.467 mmol) in 2-propanol (8 mL) was added conc. H<sub>2</sub>SO<sub>4</sub> (1 drop) and the reaction mixture was heated for 6 h at 85°C. After cooling to room temperature, the mixture was kept at 4°C overnight and then the crude solid product was collected by vacuum filtration and the crude solid product was purified by trituration with 2-propanol to give a pale yellow solid. Yield 0.134 g (59 %), mp. 107-108 °C. UV (CH<sub>3</sub>OH) 397 nm ( $\epsilon$  13,158), 323 nm ( $\epsilon$  5,223). <sup>1</sup>H NMR (CDCl<sub>3</sub>, 500 MHz): 15.27 (s, 1H), 8.15 (d, *J*=2.7 Hz, 1H), 7.84 (s, 1H), 7.51-7.46 (m, 2H), 7.35-7.30 (m, 1H), 7.16-7.07 (m, 3H), 6.86-6.80 (m, 2H), 5.22-5.17 (m, 3H), 3.74 (s, 2H), 1.36 (d, *J*=6.4 Hz, 2H). <sup>13</sup>C NMR (CDCl<sub>3</sub>, 125 MHz): 184.8, 173.9, 163.2, 162.1, 161.9, 161.8, 161.2, 160.2, 159.9, 159.4, 144.4, 141.5, 131.7, 131.1, 130.5, 124.7, 123.7, 122.4, 121.9, 121.8, 117.2, 115.6, 111.6, 104.3, 101.4, 70.5, 47.3, 30.6, 21.7. HRMS: calcd for C<sub>26</sub>H<sub>23</sub>F<sub>3</sub>NO<sub>5</sub>, 486.1528 [M+H]<sup>+</sup>, found 486.1504.

### Area % Report

Data File: C:\Documents and Settings\Administrator\Desktop\VN-Compounds\10-26-2010\_VN-IV-151(1mg/L)  
Method: C:\Documents and Settings\Administrator\My Documents\Metabolic studies  
Acquired: 10/26/2010 2:49:34 PM  
Printed: 5/17/2011 3:12:52 PM

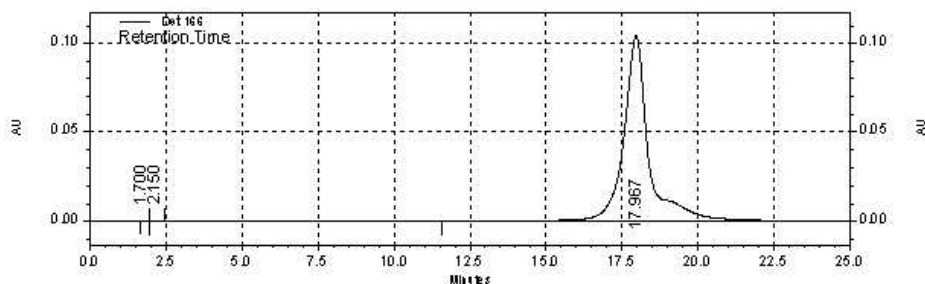

### Det 166 Results

| Time   | Area    | Area % | Height | Height % |
|--------|---------|--------|--------|----------|
| 1.700  | 487     | 0.01   | 56     | 0.05     |
| 2.150  | 1118    | 0.02   | 73     | 0.07     |
| 17.967 | 6097419 | 99.97  | 104528 | 99.88    |

**Figure S1.** Reversed-phase HPLC of **10** supporting its purity of >95 %.

### Area % Report

Data File: C:\Documents and Settings\Administrator\My Documents\Metabolic studies\VN-IV-140  
Method: C:\Documents and Settings\Administrator\My Documents\Metabolic studies  
Acquired: 4/1/2010 10:26:21 AM  
Printed: 5/17/2011 3:19:58 PM

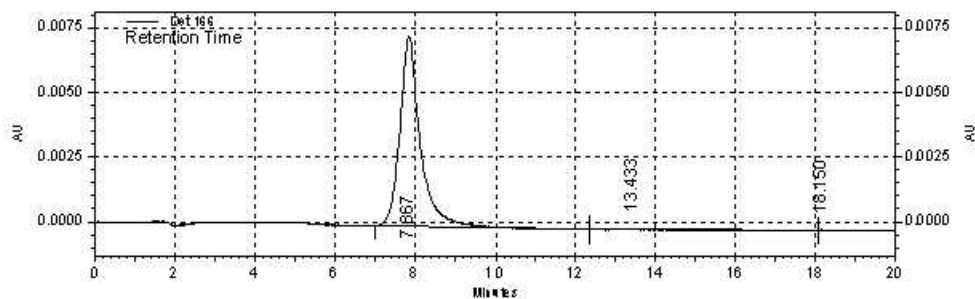

### Det 166 Results

| Time   | Area   | Area % | Height | Height % |
|--------|--------|--------|--------|----------|
| 7.867  | 264343 | 99.64  | 7402   | 99.17    |
| 13.433 | 692    | 0.26   | 39     | 0.52     |
| 18.150 | 265    | 0.10   | 23     | 0.31     |

**Figure S2.** Reversed-phase HPLC of compound **2** supporting its purity of >95 %.



### **MAGI Cell Assays for Anti-HIV Activity**

MAGI cells are infected with virus in the presence of test compound. If the virus is able to infect and replicate in the cells it will proceed through reverse transcription and integration and begin transcription from the integrated provirus. One of the first virus proteins produced is HIV-1 Tat, which transactivates the HIV-1 LTR promoter driving expression of  $\beta$ -galactosidase from an LTR- $\beta$ -galactosidase reporter gene construct engineered into the cells. As a result, infected cells begin to overproduce the  $\beta$ -galactosidase enzyme. Forty-eight hours (single-cycle assay) or 6-days (multi-cycle assay) post infection, the cells are lysed and  $\beta$ -galactosidase enzyme activity is measured using a chemiluminescence detection method (Perkin Elmer Applied Biosystems). Compound toxicity is monitored on replicate plates using MTS dye reduction (CellTiter 96® Reagent, Promega, Madison, WI).

### **General Method for Cytochrome P-450 Isozyme Assays**

Incubation mixtures contained potassium phosphate buffer (100 mM, pH 7.4),  $\text{MgCl}_2$  (5 mM), the requisite substrate dissolved in an appropriate solvent, compound **2** (range of concentrations) and pooled human liver microsomes. The reaction mixture (final volume 100  $\mu\text{L}$ ) was pre-incubated for 3 min at 37 °C before initiation of the reaction by the addition of NADPH (final concentration 2 mM). Each reaction was terminated by adding ice-cold acetonitrile (100  $\mu\text{L}$ ). In each incubation mixture, the organic solvent concentration was kept at or below 1.5% by volume. Proteins were precipitated from the samples by centrifugation at 5000g for 10 min at room temperature in a microcentrifuge tube. The supernatant was analyzed by HPLC-UV (and HRMS where necessary) for detection of substrates and metabolites. Reversed-phase HPLC analyses were performed on a Beckman Coulter Gold 127 solvent system with a Gold 166 UV

analytical detector. The data were collected and processed using a Gold software package. HPLC columns, conditions and elution details are given below.

**Table S1.** HPLC Assay conditions for CYP 450 isozyme inhibition and related studies

| Compounds                                       | Conditions                                                                                       | Description                                                                                                                                                                                                                                                                                                                                                                   |
|-------------------------------------------------|--------------------------------------------------------------------------------------------------|-------------------------------------------------------------------------------------------------------------------------------------------------------------------------------------------------------------------------------------------------------------------------------------------------------------------------------------------------------------------------------|
| Testosterone and 6 $\beta$ -hydroxytestosterone | <i>Mobile Phase Elution</i><br><br><i>UV Detection</i><br><i>Retention Time</i><br><i>Column</i> | Gradient of A and B. Flow Rate: 1.2 mL/min<br>A: 0.01 M Potassium phosphate buffer pH 4.5<br>B: Acetonitrile,<br>0-3 min, 25 % B, 3- 7 min, 57 % B, 7-14 min, 57 % B 14- 18 min, 100 % B, 18-23 min, 100 % B<br>254 nm<br>14.48 min and 10.25 min respectively<br>Discovery® C18 (5 $\mu$ m, 250 mm x 4.6 mm, 180 Å)                                                          |
| Triazolam and 4-hydroxytriazolam                | <i>Mobile Phase Elution</i><br><br><i>UV Detection</i><br><i>Retention Time</i><br><i>Column</i> | Gradient of A and B. Flow Rate: 1.0 mL/min<br>A: 0.01 M Potassium phosphate buffer pH 3.0<br>B: Acetonitrile<br>0-3 min, 30 % B, 3- 7 min, 48% B, 7-9 min, 48 % B 9-11 min, 100 % B, 11- 16 min, 100 % B<br>260 nm<br>8.9 and 6.2 min, respectively<br>Nova-Pak C18 (4 $\mu$ m, 150 mm x 3.9 mm, 60 Å)                                                                        |
| Dextromethorphan and Dextrorphan                | <i>Mobile Phase Elution</i><br><br><i>UV Detection</i><br><i>Retention Time</i><br><i>Column</i> | Gradient of A and B. Flow Rate: 1.0 mL/min<br>A: 0.01 M Potassium phosphate buffer pH 3.0<br>B: 1:1 acetonitrile: methanol (v/v)<br>0-3 min, 28 % B, 3- 8 min, 60 % B, 8-10 min, 60 % B 10-12 min, 100 % B, 12- 16 min, 100 % B<br>278 nm<br>10.2 min and 4.9 min, respectively.<br>Nova-Pak C18 (4 $\mu$ m, 150 mm x 3.9 mm, 60 Å)                                           |
| Amodiaquine and N-desethylamodiaquine           | <i>Mobile Phase Elution</i><br><br><i>UV Detection</i><br><i>Retention Time</i><br><i>Column</i> | <b>Gradient of A and B. Flow Rate: 1.0 mL/min</b><br><b>A: 0.01 M Potassium phosphate buffer pH 3.0</b><br><b>B: acetonitrile: methanol (250:200 v/v)</b><br><b>0-5 min, 18 % B, 5- 7 min, 32 % B, 7-10 min, 100 % B 10-18 min, 100 % B</b><br><b>342 nm</b><br><b>6.5 min and 5.1 min, respectively.</b><br><b>Nova-Pak C18 (4 <math>\mu</math>m, 150 mm x 3.9 mm, 60 Å)</b> |

## Microsome Stability Assays

The incubation mixture (final volume of 400  $\mu$ L) contained liver microsomes (microsomal protein, 0.5 mg/mL), compound 2 (200  $\mu$ M in DMSO), G-6-P-DH (0.5 U/mL), and G-6-P (5 mM) in potassium phosphate buffer (100 mM, pH 7.4) containing  $MgCl_2$  (5 mM). DMSO used was kept below 0.5% by volume in the final incubation mixture. The reaction mixture was pre-incubated for 3 min at 37  $^{\circ}$ C before the addition of NADPH (final concentration 2 mM) and then incubated further at 37  $^{\circ}$ C with continued sampling as described. An aliquot (60  $\mu$ L) of the incubation mixture was taken in a microcentrifuge tube and quenched through the addition of ice cold acetonitrile (120  $\mu$ L). Sampling intervals of 0, 30, 120 and 180 min were used. The proteins were removed by centrifugation at 5,000g for 5 min at room temperature then the supernatant was analyzed by HPLC-UV (HRMS where needed) to monitor the compound and its metabolite over time. Reversed-phase HPLC analyses were performed on a Beckman Coulter Gold 127 solvent system with a Gold 166 UV analytical detector. The data were collected and processed using a Gold software package. The elution process involved: analytical column Delta Pak C18 (15  $\mu$ m, 300 mm x 3.9 mm, 100  $\text{\AA}$ ) with a mobile phase of (A)10 mM potassium phosphate buffer (pH 6.5) and (B) acetonitrile, which were used as follows: 0-2 min, 30 % B, 2- 8 min, 30-60 % B, 8- 18 min, 60 % B. The flow rate was kept at 1.5 mL/min, with UV detection at 360 nm. Retention times of compound 2 and its minor cleavage product, 8 [ $<5\%$ )] were 7.8 and 13.4 min, respectively, under these HPLC conditions.

## UGT-catalyzed Glucuronidation Studies

Final incubation mixtures (final volume of 500  $\mu\text{L}$ ) contained pooled human liver microsomes (microsomal proteins, 1.0 mg/mL), compound 2 or raltegravir (50  $\mu\text{M}$  in DMSO), UDPGA (4 mM), alamethicin (0.024 mg/mg protein), D-saccharic acid 1,4-lactone (10 mM) in potassium phosphate buffer (100 mM, pH 7.4) containing  $\text{MgCl}_2$  (5 mM). Initially, the mixture of liver microsomes and alamethicin in potassium phosphate buffer containing  $\text{MgCl}_2$  was kept in ice ( $0^\circ\text{C}$ ) for 15 min. D-saccharic acid-1,4-lactone and the test compound was then added. This mixture was preincubated at  $37^\circ\text{C}$  for 3 minutes and UDPGA (4 mM) was then added to initiate the reaction. The DMSO used was held below 1.0 % by volume in the final incubation mixtures. An aliquot (60  $\mu\text{L}$ ) of the incubation mixture was removed at intervals of 0, 30, 60, and 120 min and placed in a microcentrifuge tube and the reaction terminated by the addition of ice cold acetonitrile (60  $\mu\text{L}$ ). The precipitated proteins were removed by centrifugation at 5,000g for 5 min at room temperature before separation, analysis and detection of the test compound and its glucuronide in the supernatant by HPLC/UV and HRMS (where needed). Reversed-phase HPLC analyses for glucuronidation studies for compound 2 were performed on a Beckman Coulter Gold 127 solvent system with a Gold 166 UV analytical detector. The data were collected and processed using a Gold software package. The elution process involved: analytical column Delta Pak C18 (15 micron, 300 mm x 3.9 mm, 100  $\text{\AA}$ ) with a mobile phase of (A) 10 mM potassium phosphate buffer (pH 6.5) and (B) acetonitrile, which were used as follows: 0-3 min, 12% B, 3-7 min, 12-38% B, 7-9 min, 38% B, 9-12 min, 38-65% B, 12-17 min, 65% B. The flow rate was kept at 1.5 mL/min, with UV detection at 350 nm. Reversed-phase HPLC analyses for the glucuronidation of raltegravir were performed on a Beckman Coulter Gold 127 solvent system. The data were collected and processed using a

**Gold software package. The elution process involved: analytical column Ultrasphere® dp (5 µm, 150 mm x 4.6 mm, (Beckman)) with a mobile phase of (A) 10 mM monobasic potassium phosphate buffer pH 5.2 and (B) acetonitrile (0.2 % formic acid), which were used as follows: 0-2 min, 10 % B, 2- 40 min, 10-50 % B, 40- 42 min, 10 % B, 42- 49 min 10% B. The flow rate was kept at 1.0 mL/min, with UV detection at 300 nm. HPLC retention times: raltegravir, 30.6 min, its glucuronide 16.7 min; compound 2, 7.8 min, its glucuronide ~ 4 min (not present).**
